# Supplementary material for: Morgagni's Hernia
Source: Atypon-hosted journal article supplement (doi:10.1056/nejmicm0907898), 2010-05-12

## Supplementary Appendix

This appendix has been provided by the authors to give readers additional information about their work.

Supplement to: Seydel B, Detry O. Morgagni's hernia. *N Engl J Med* 2010;362:e61.

**A**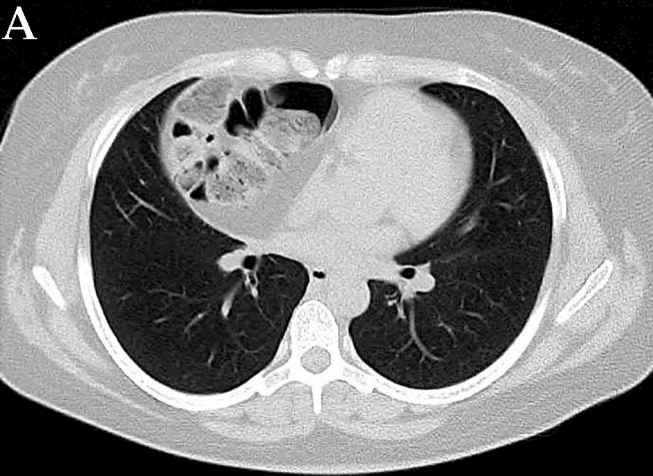**B**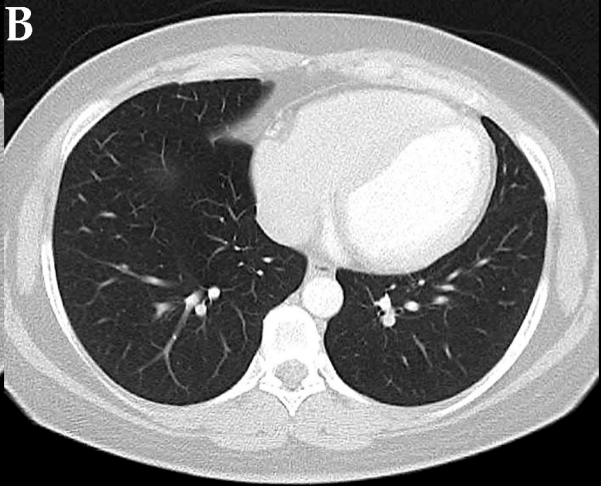

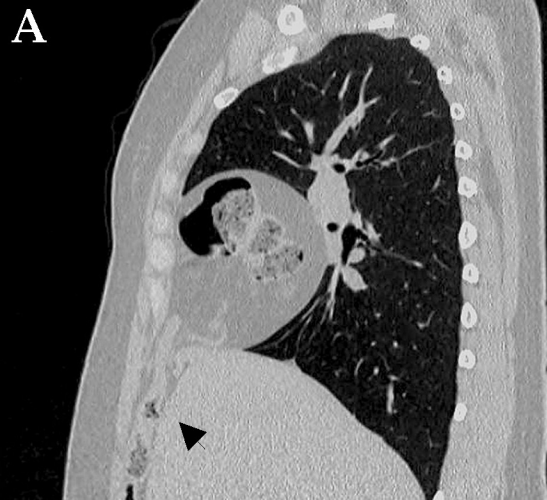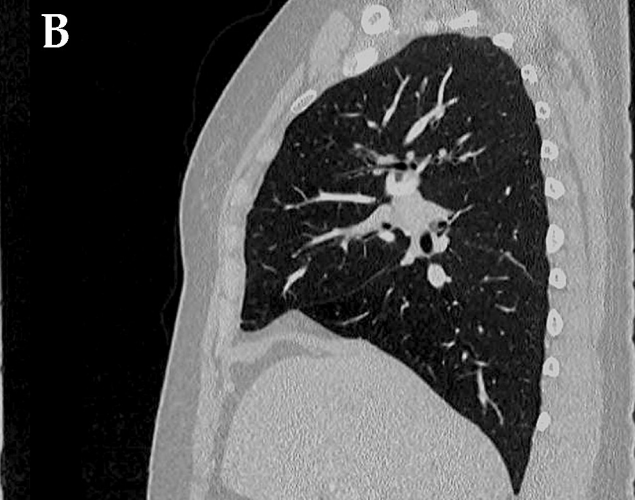

Supplement: nejm_seydel_e61sa1.pdf [file nejm_seydel_e61sa1.pdf]
